# Supplementary material
Source: Springer Nature journal article supplement (https://www.springermedizin.de/resource/supplementary/12879_2013_2544_MOESM3_ESM.pdf/9444812)

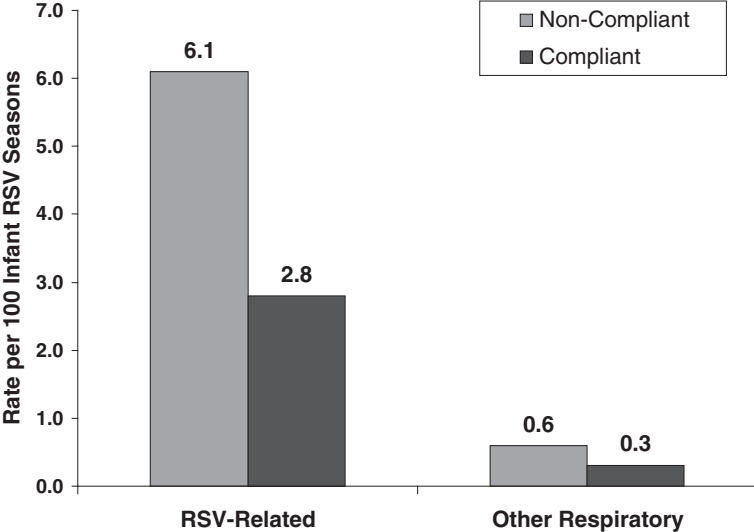

Supplement: MOESM3 [file 9444812]
